# Supplementary material
Source: PubMed Central journal article supplement (PMC7029126)

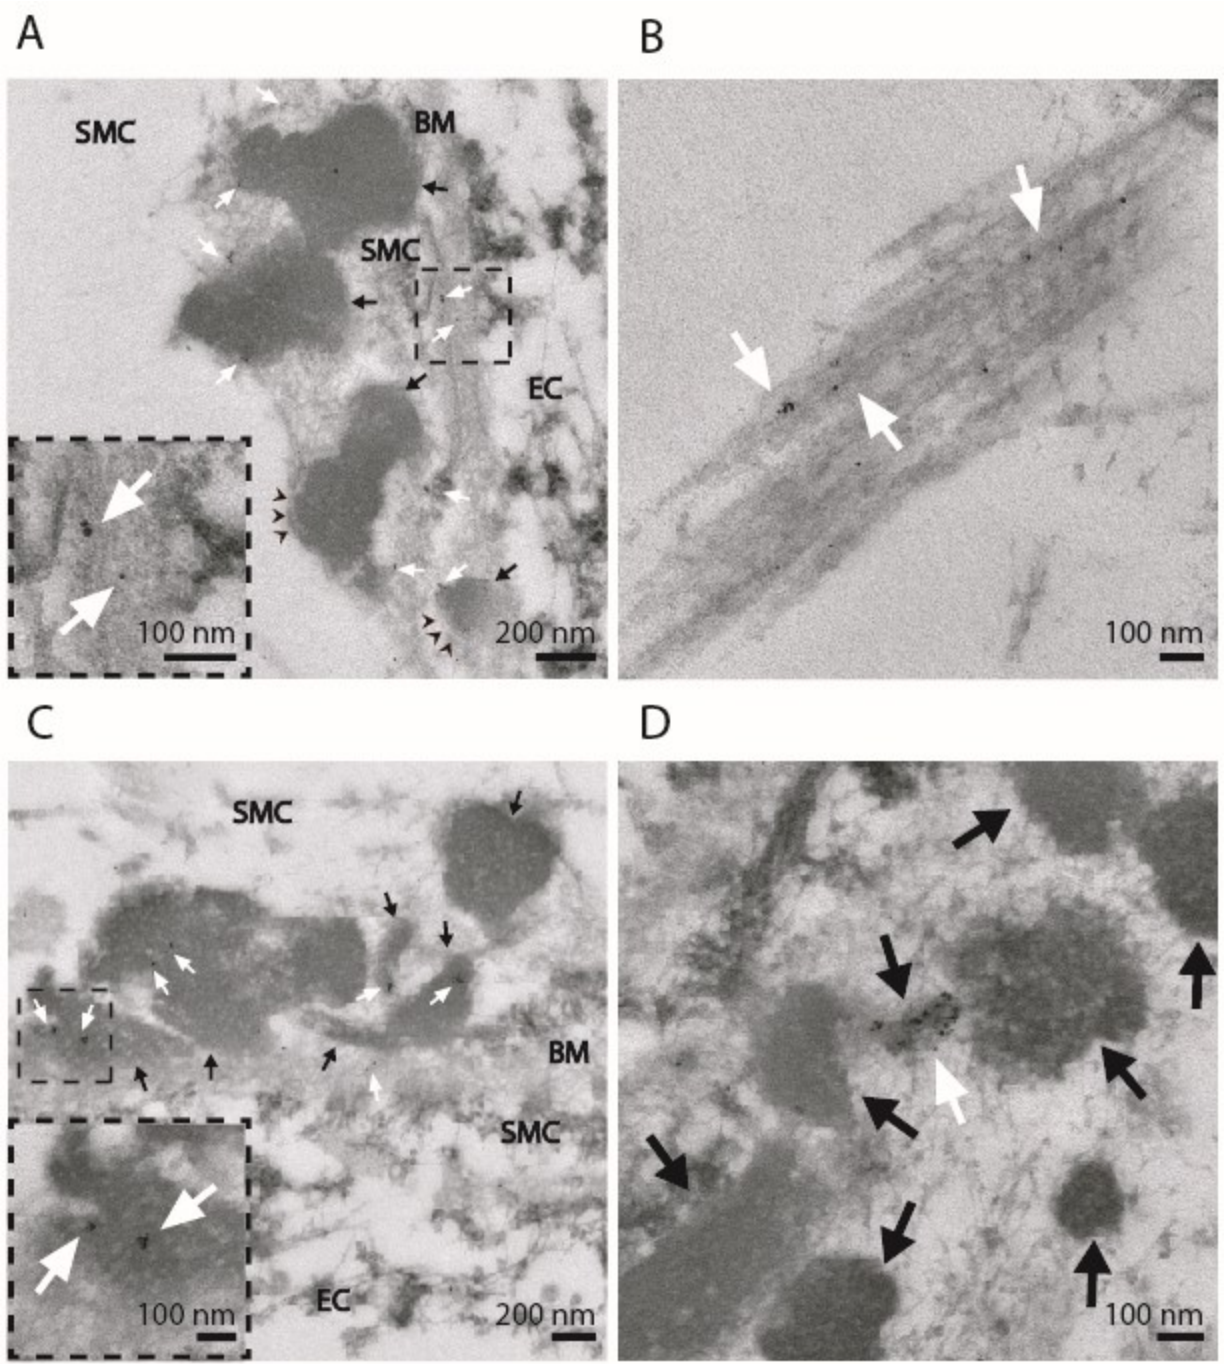

Figure S1

Supplement: supp_RA119.007724_143355_3_supp_452118_q3dry1.pdf [file supp_RA119.007724_143355_3_supp_452118_q3dry1.pdf]
